# Supplementary material for: Pseudanabaena galeata CCNP1313—Biological Activity and Peptides Production
Source: MDPI journal article supplement (doi:10.3390/toxins14050330), 2022-05-06

## Article

# *Pseudanabaena galeata* CCNP1313 biological activity and peptides production

Marta Cegłowska, Karolina Szubert, Beata Grygier, Marzena Lenart, Jacek Plewka, Aleksandra Milewska, Kinga Lis, Artur Szczepański, Yuliya Chykunova, Emilia Barreto-Duran, Krzysztof Pyrc, Alicja Kosakowska and Hanna Mazur-Marzec

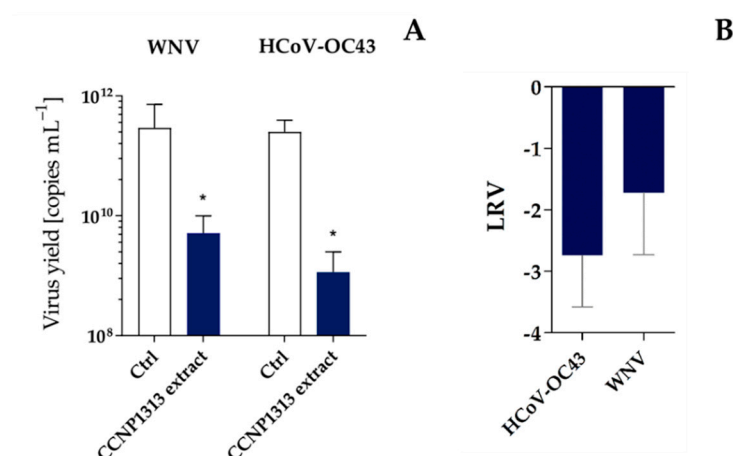

**Figure S1.** Antiviral activities of the *Pseudanabaena galeata* CCNP1313 crude extract against human coronavirus OC43 (HCoV-OC43) in HCT-8 cells and West Nile Virus (WNV) in Vero E6 cells. The figure shows (A) virus yield, analysed by RT-qPCR, of cell culture supernatants and (B) logarithmic removal value (LRV) showing the relative decrease in the amount of the virus in the cell culture media compared to the untreated samples. Ctrl stands for viral control—untreated samples infected with the virus. Data are presented as mean values with standard deviation; the statistical analyses were performed with the Mann–Whitney test. The significance is marked with \* for  $p < 0.05$ .

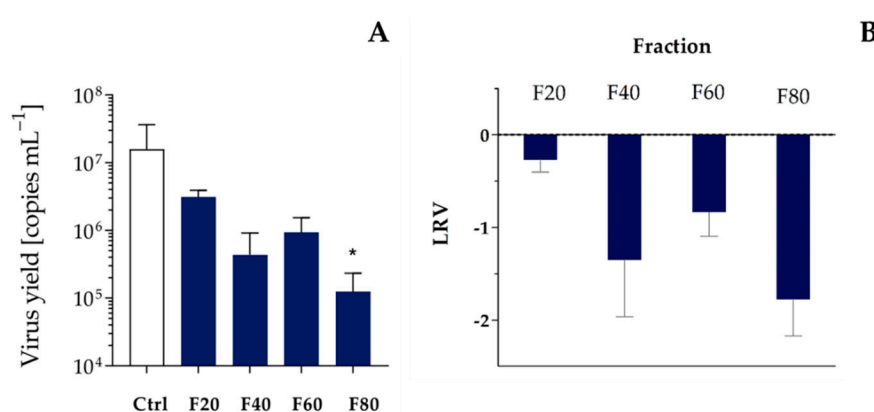

**Figure S2.** Antiviral activities of the *Pseudanabaena galeata* CCNP1313 solid-phase extraction (SPE) fractions against severe acute respiratory syndrome coronavirus 2 (SARS-CoV-2) in Vero E6 cells. The figure shows (A) virus yield, analysed by RT-qPCR, of cell culture supernatants and (B) the logarithmic removal value (LRV) showing the relative decrease in the amount of the virus in the cell culture media compared to the untreated sample. Ctrl stands for viral control—untreated samples infected with the virus. Data are presented as mean values with standard deviation; the statistical analyses were performed with the Kruskal–Wallis test. The significance is marked with \* for  $p < 0.05$ .

**Table S2.** The cytopathic effects (CPE) of the *Pseudanabaena galeata* CCNP1313 flash chromatography fractions after SARS-CoV-2 infection of the A549<sup>ACE2/TMPRSS2</sup> cell line. The CPE was assessed microscopically after 96-h from the infection (TCID<sub>50</sub> = 1600 mL<sup>-1</sup> based on the following scale: (+++) indicates no reduction of infection-induced CPE, comparable to the positive control; (++) indicates 20-40% reduction of infection-induced CPE; (+) indicates 50–70% reduction of infection-induced CPE; (–) indicates maximal infection reduction, comparable to the mock-infected samples (+/–) indicates an uncertain CPE; (tox) indicates toxicity).

| Flash chromatography fraction * | Extract concentration |     |                        |     |                        |         |
|---------------------------------|-----------------------|-----|------------------------|-----|------------------------|---------|
|                                 | 1 µg mL <sup>-1</sup> |     | 10 µg mL <sup>-1</sup> |     | 50 µg mL <sup>-1</sup> |         |
|                                 | Repetition            |     | Repetition             |     | Repetition             |         |
|                                 | I                     | II  | I                      | II  | I                      | II      |
| F20.1                           | +++                   | +++ | ++                     | ++  | +                      | +       |
| F20.2                           | +                     | +++ | ++                     | ++  | +                      | ++      |
| F20.3                           | +++                   | +++ | ++                     | ++  | +++                    | ++      |
| F20.4                           | +++                   | +++ | ++                     | ++  | +                      | -       |
| F20.5                           | +++                   | +++ | +                      | +   | +                      | +       |
| F20.6                           | +++                   | +++ | +                      | +   | -                      | +/-     |
| F20.7                           | +++                   | ++  | -                      | +   | -                      | -       |
| F40.1                           | ++                    | +++ | +                      | +   | +                      | +       |
| F40.2                           | +                     | ++  | +                      | +   | -                      | +/-     |
| F40.3                           | +++                   | +++ | ++                     | +   | +/-                    | +       |
| F40.4                           | +++                   | ++  | +                      | +   | tox                    | tox     |
| F40.5                           | +++                   | ++  | +                      | +   | +/-                    | tox     |
| F40.6                           | +                     | ++  | +                      | -   | +/-                    | -       |
| F40.7                           | +                     | ++  | +                      | +   | +/-                    | +/-     |
| F60.1                           | +                     | +   | -                      | -   | +/-                    | -       |
| F60.2                           | +++                   | ++  | +                      | +/- | -                      | +/-     |
| F60.3                           | ++                    | ++  | +                      | +   | +(tox)                 | ++(tox) |
| F60.4                           | ++                    | +   | +/-                    | +   | +                      | ++      |
| F60.5                           | ++                    | ++  | +                      | ++  | +                      | +       |
| F60.6                           | ++                    | ++  | +                      | +   | tox                    | ++(tox) |
| F60.7                           | ++                    | ++  | +++                    | +   | +                      | ++      |
| F80.1                           | ++                    | ++  | +                      | +   | -                      | -       |
| F80.2                           | ++                    | ++  | +                      | +   | +                      | +/-     |
| F80.3                           | +                     | ++  | +                      | +   | -                      | -       |
| F80.4                           | +                     | ++  | ++                     | ++  | -                      | -       |
| F80.5                           | +                     | ++  | +                      | +   | -                      | -       |
| F80.6                           | ++                    | ++  | +                      | +   | +/-                    | +       |
| F80.7                           | ++                    | ++  | ++                     | ++  | +                      | +       |
| F80.8                           | +++                   | +++ | ++                     | +   | +                      | +/-     |
| F80.9                           | ++                    | ++  | +                      | +   | +/-                    | +       |
| F80.10                          | ++                    | ++  | +                      | ++  | ++                     | -       |

\* The fractions are marked as Fx.y, where x stands for MeOH concentration and y is the number of the subsequent fractions eluted at x% MeOH.

**Table S3.** The cytopathic effects (CPE) of isolated peptides (A<sub>3</sub>–A<sub>5</sub> and A<sub>8</sub>) and samples containing a mixture of 2–3 peptides (A<sub>1</sub>, A<sub>2</sub> and A<sub>6</sub>) from *Pseudanabaena galeata* CCNP1313 after SARS-CoV-2 infection of the A549<sup>ACE2/TMPRSS2</sup> cell line. The CPE was assessed microscopically after 96-h from the infection (TCID<sub>50</sub> = 1600 mL<sup>-1</sup> based on the following scale: (+++) indicates no reduction of infection-induced CPE, comparable to the positive control; (++) indicates 20–40% reduction of infection-induced CPE; (+) indicates 50–70% reduction of infection-induced CPE; (–) indicates maximal infection reduction, comparable to the mock-infected samples. (NT) indicates not tested).

| Sample         | Sample concentration   |     |                        |     |                         |     |
|----------------|------------------------|-----|------------------------|-----|-------------------------|-----|
|                | 10 µg mL <sup>-1</sup> |     | 50 µg mL <sup>-1</sup> |     | 100 µg mL <sup>-1</sup> |     |
|                | Repetition             |     |                        |     |                         |     |
|                | I                      | II  | I                      | II  | I                       | II  |
| A <sub>1</sub> | +++                    | +++ | ++                     | ++  | +++                     | +   |
| A <sub>2</sub> | +++                    | +++ | ++                     | ++  | +                       | +   |
| A <sub>3</sub> | ++                     | +++ | +                      | ++  | -                       | +   |
| A <sub>4</sub> | +++                    | +++ | ++                     | ++  | NT                      | NT  |
| A <sub>5</sub> | +++                    | +++ | ++                     | +++ | +                       | ++  |
| A <sub>6</sub> | +++                    | +++ | +++                    | +++ | ++                      | +++ |
| A <sub>7</sub> | +++                    | +++ | +++                    | +++ | +++                     | +++ |
| A <sub>8</sub> | +++                    | +++ | ++                     | +++ | +                       | +   |

**Table S4.** The effects of selected *Pseudanabaena galeata* CCNP1313 flash chromatography fractions on the activity of SARS-CoV-2 PL<sup>Pro</sup> protease. Data are presented as mean values with standard deviation.

| Fraction*         | Initial velocity<br>(mAU min <sup>-1</sup> ) | SD | Inhibition<br>(%) |
|-------------------|----------------------------------------------|----|-------------------|
| PL <sup>Pro</sup> | 615                                          | 1  | 0                 |
| F20.6             | 55                                           | 5  | 10                |
| F20.7             | 512                                          | 28 | 17                |
| F40.2             | 531                                          | 20 | 14                |
| F40.6             | 423                                          | 38 | 31                |
| F60.2             | 491                                          | 16 | 20                |
| F80.2             | 413                                          | 40 | 33                |
| F80.3             | 33                                           | 36 | 46                |
| F80.4             | 316                                          | 19 | 49                |
| F80.5             | 251                                          | 7  | 59                |
| F80.6             | 278                                          | 10 | 55                |

\* The fractions are marked as Fx.y, where x stands for MeOH concentration and y is the number of the subsequent fractions eluted at x% MeOH.

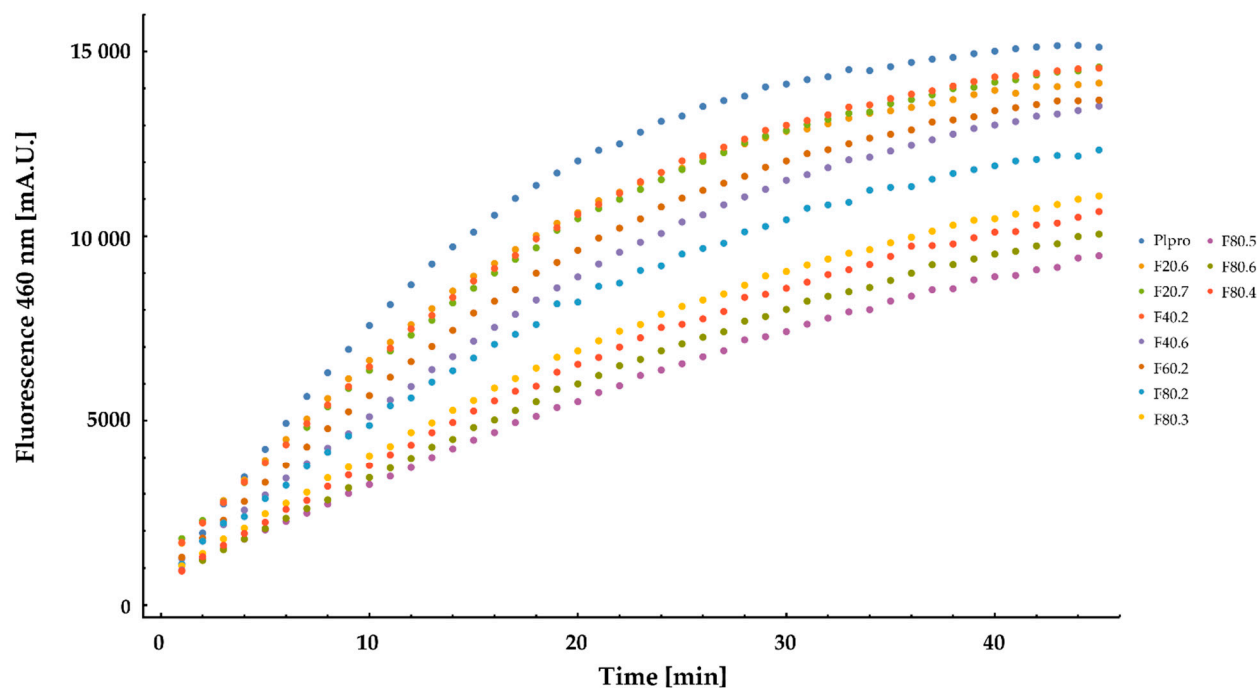

**Figure S3.** The effects of selected *Pseudanabaena galeata* CCNP1313 flash chromatography fractions on the activity of SARS-CoV-2 PL<sup>Pro</sup> protease. The fractions are marked as Fx.y, where x stands for MeOH concentration and y is the number of the subsequent fractions eluted at x% MeOH. Data are presented as mean values.

**Table S5.** The effects of selected *Pseudanabaena galeata* CCNP1313 flash chromatography fractions on the activity of SARS-CoV-2 M<sup>Pro</sup> protease. inhibition fractions. Data are presented as mean values with standard deviation.

| Fraction*        | Initial velocity<br>(mAU min <sup>-1</sup> ) | SD | Inhibition<br>(%) |
|------------------|----------------------------------------------|----|-------------------|
| M <sup>Pro</sup> | 38                                           | 0  | 0                 |
| F40.1            | 34                                           | 2  | 9                 |
| F40.6            | 33                                           | 1  | 13                |
| F40.7            | 30                                           | 0  | 22                |
| F60.2            | 31                                           | 0  | 20                |
| F80.1            | 29                                           | 1  | 25                |
| F80.2            | 33                                           | 2  | 14                |
| F80.3            | 33                                           | 2  | 14                |
| F80.4            | 29                                           | 2  | 23                |
| F80.5            | 30                                           | 0  | 21                |
| F80.6            | 32                                           | 0  | 17                |

\* The fractions are marked as Fx.y, where x stands for MeOH concentration and y is the number of the subsequent fractions eluted at x% MeOH.

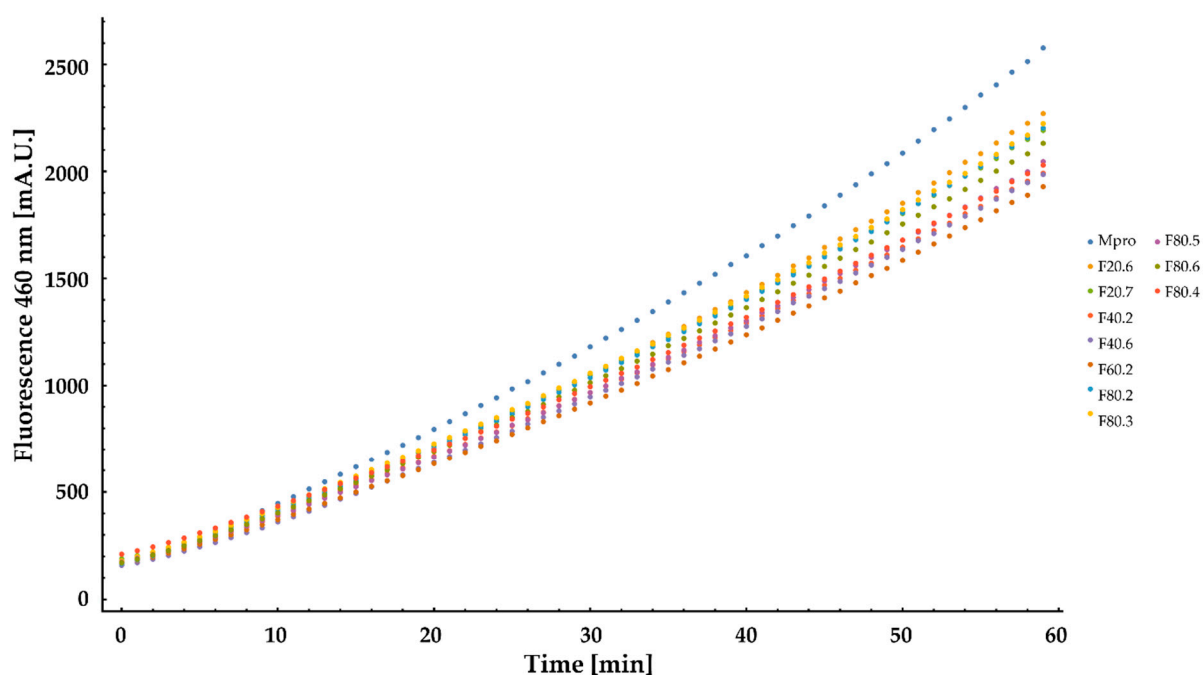

**Figure S4.** The effects of selected *Pseudanabaena galeata* CCNP1313 flash chromatography fractions on the activity of SARS-CoV-2 M<sup>Pro</sup> protease. The fractions are marked as Fx.y, where x stands for MeOH concentration and y is the number of the subsequent fractions eluted at x% MeOH. Data are presented as mean values.

**Table S6.** The effects of isolated peptides and samples containing a mixture of 2–3 peptides from *Pseudanabaena galeata* CCNP1313 on the activity of SARS-CoV-2 PL<sup>Pro</sup> protease. Data are presented as mean values with standard deviation.

| Sample         | Initial velocity<br>(mAU min <sup>-1</sup> ) | SD | Inhibition<br>(%) |
|----------------|----------------------------------------------|----|-------------------|
| A <sub>1</sub> | 252                                          | 21 | 19                |
| A <sub>2</sub> | 205                                          | 3  | 34                |
| A <sub>3</sub> | 176                                          | 34 | 43                |
| A <sub>4</sub> | 187                                          | 21 | 40                |
| A <sub>5</sub> | 202                                          | 12 | 35                |
| A <sub>6</sub> | 242                                          | 18 | 22                |
| A <sub>7</sub> | 222                                          | 20 | 28                |
| A <sub>8</sub> | 227                                          | 9  | 27                |

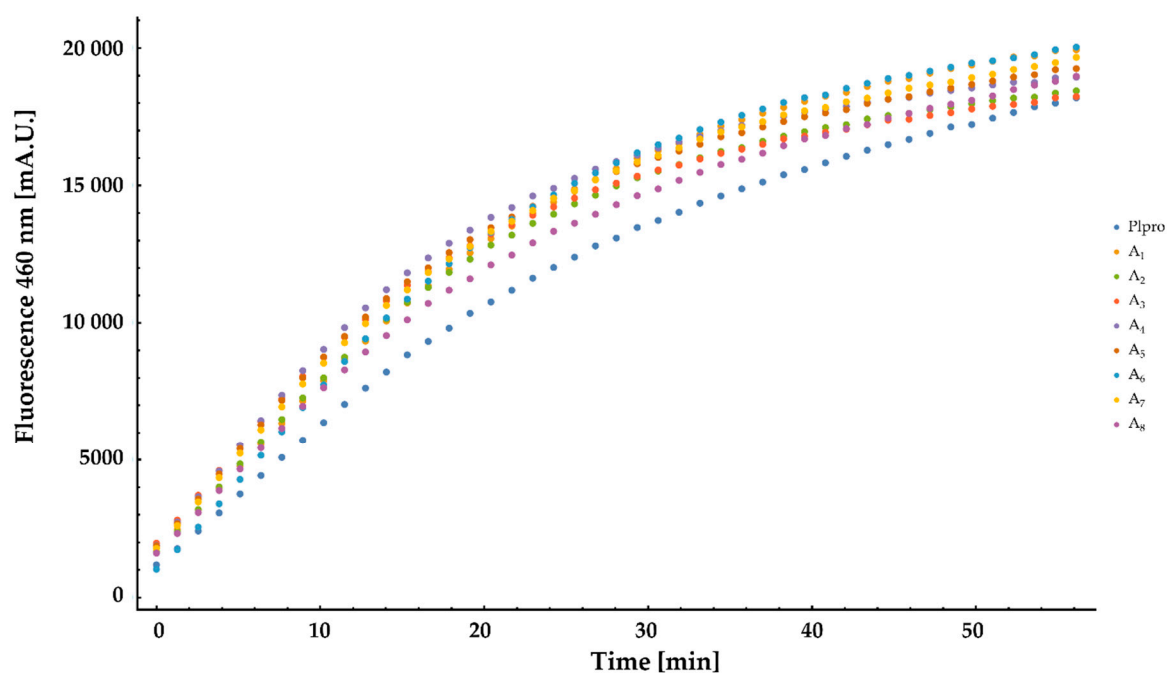

**Figure S5.** The effects of isolated peptides and samples containing a mixture of 2–3 peptides from *Pseudanabaena galeata* CCNP1313 on the activity of SARS-CoV-2 PL<sup>Pro</sup> protease.

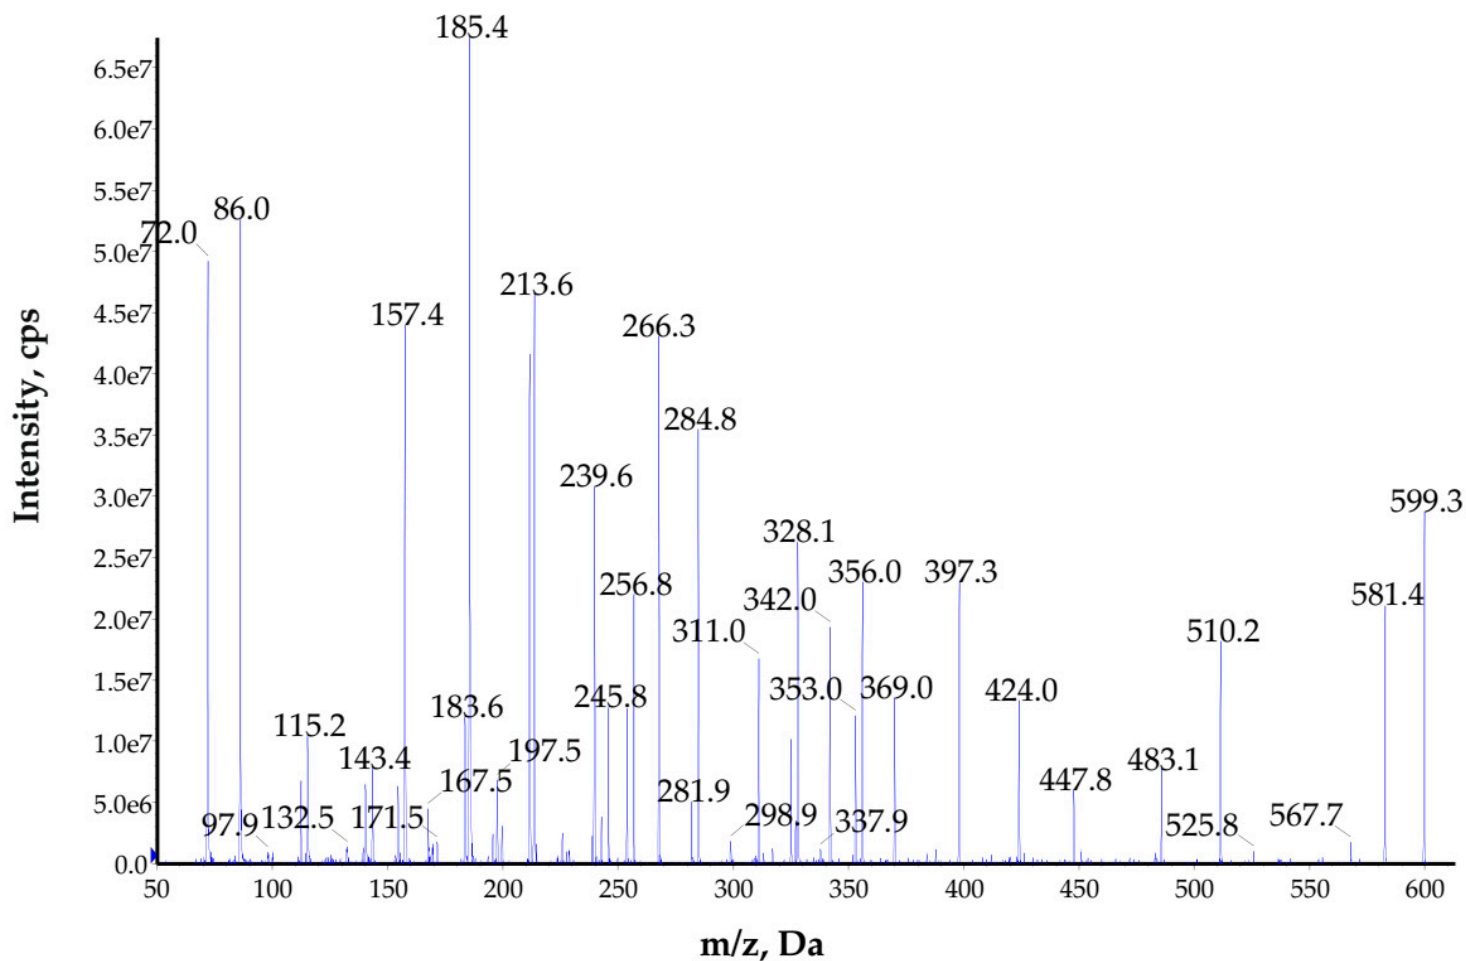

**Figure S6.** Enhanced product ion mass spectrum of galeapeptin GP598 with the proposed structure Ala-Leu\*-Val-Leu\*-Leu\*-Ala, characterised based on the following ion peaks at  $m/z$  599  $[M + H]^+$ , 581  $[M + H - H_2O]^+$ , 510  $[M + H - Ala]^+$ , 483  $[M + H - Ala - CO]^+$ , 397  $[M + H - (Leu^* + Ala)]^+ / [Ala + Leu^* + Val + Leu^* + H]^+$ , 369  $[Ala + Leu^* + Val + Leu^* + H - CO]^+$ , 284  $[Ala + Leu^* + Val + H]^+$ , 266  $[Ala + Leu^* + Val - H_2O + H]^+$ , 256  $[Ala + Leu^* + Val - CO + H]^+$ , 213  $[Leu^* + Val + H]^+$ , 185  $[Ala + Leu^* + H]^+ / [Leu^* + Val - CO + H]^+$ , 157  $[Leu^* + Ala - CO + H]^+$ , 86 Leu\* immonium ion, 72 Val immonium ion.

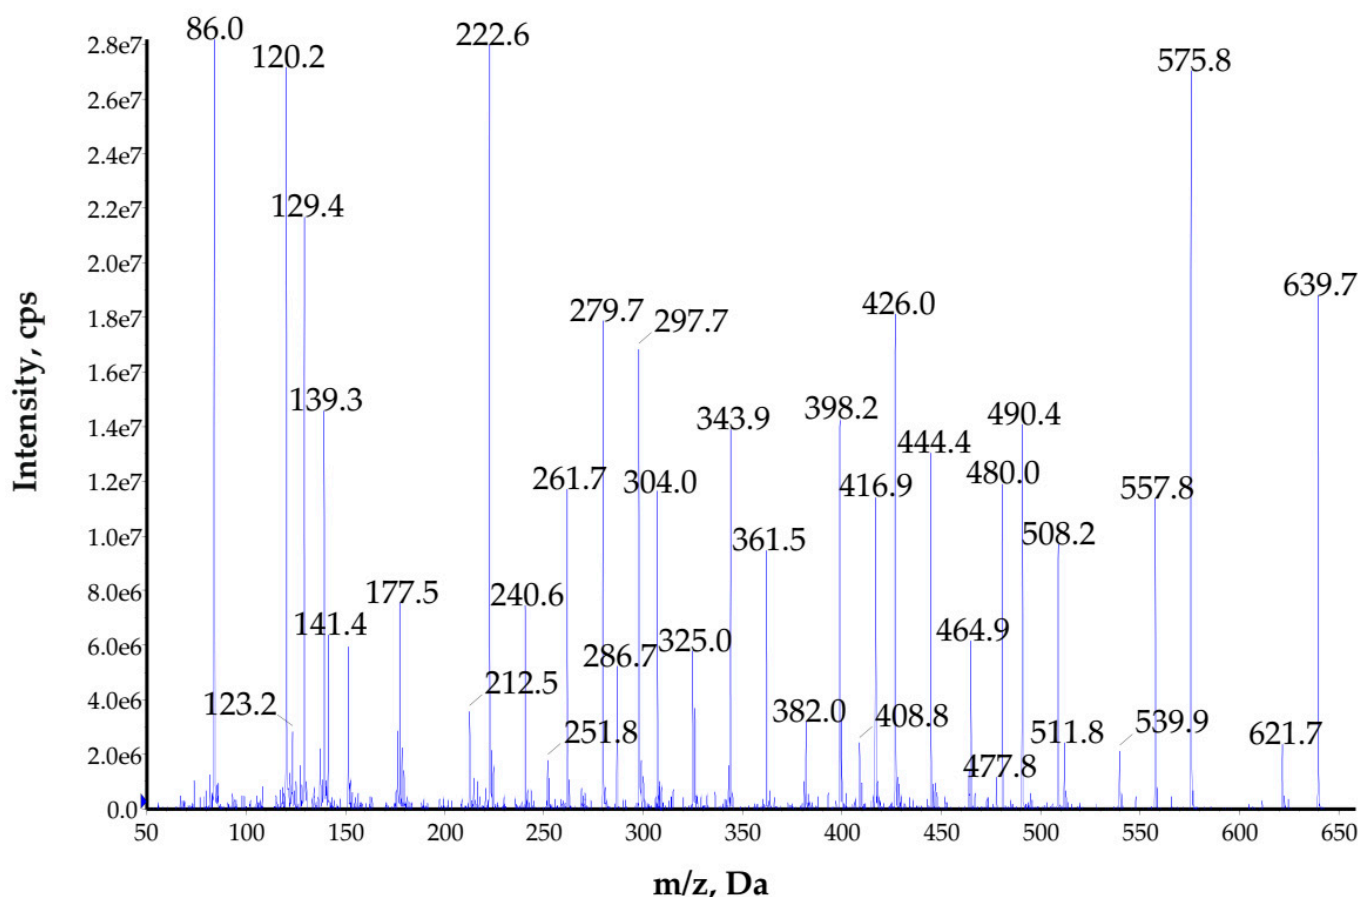

**Figure S7.** Enhanced product ion mass spectrum of a peptide named PG638 with the proposed structure Arg-MetO-Gly-Phe-Leu\*, characterised based on the following ion peaks at  $m/z$  639  $[M + H]^+$ , 621  $[M + H - H_2O]^+$ , 575  $[M + H - CH_3SOH]^+$ , 508  $[M + H - Leu]^+$ , 490  $[M + H - Leu^* - H_2O]^+$ , 480  $[M + H - Leu^* - H_2O]^+$ , 444  $[M + H - Leu^* - CH_3SOH]^+$ , 426  $[M + H - Leu^* - CH_3SOH - H_2O]^+$ , 416  $[M + H - Leu^* - CH_3SOH - CO]^+$ , 398  $[M + H - Leu^* - CH_3SOH - H_2O - CO]^+$ , 361  $[M + H - (Phe + Leu^*)]^+$ , 343  $[M + H - (Phe + Leu^*) - H_2O]^+$ , 304  $[Arg + Met(O) + H]^+$ , 297  $[M + H - CH_3SOH - (Phe + Leu^*)]^+$ , 286  $[Arg + Met(O) + H - H_2O]^+$ , 279  $[M + H - CH_3SOH - (Phe + Leu^*) - H_2O]^+$ , 240  $[Arg + Met(O) + H - CH_3SOH]^+$ , 222  $[Arg + Met(O) + H - CH_3SOH - H_2O]^+$ , 141  $[Met(O) + Gly + H - CH_3SOH]^+$ , 129 Arg immonium ion, 120 Phe immonium ion, 86 Leu\* immonium ion.



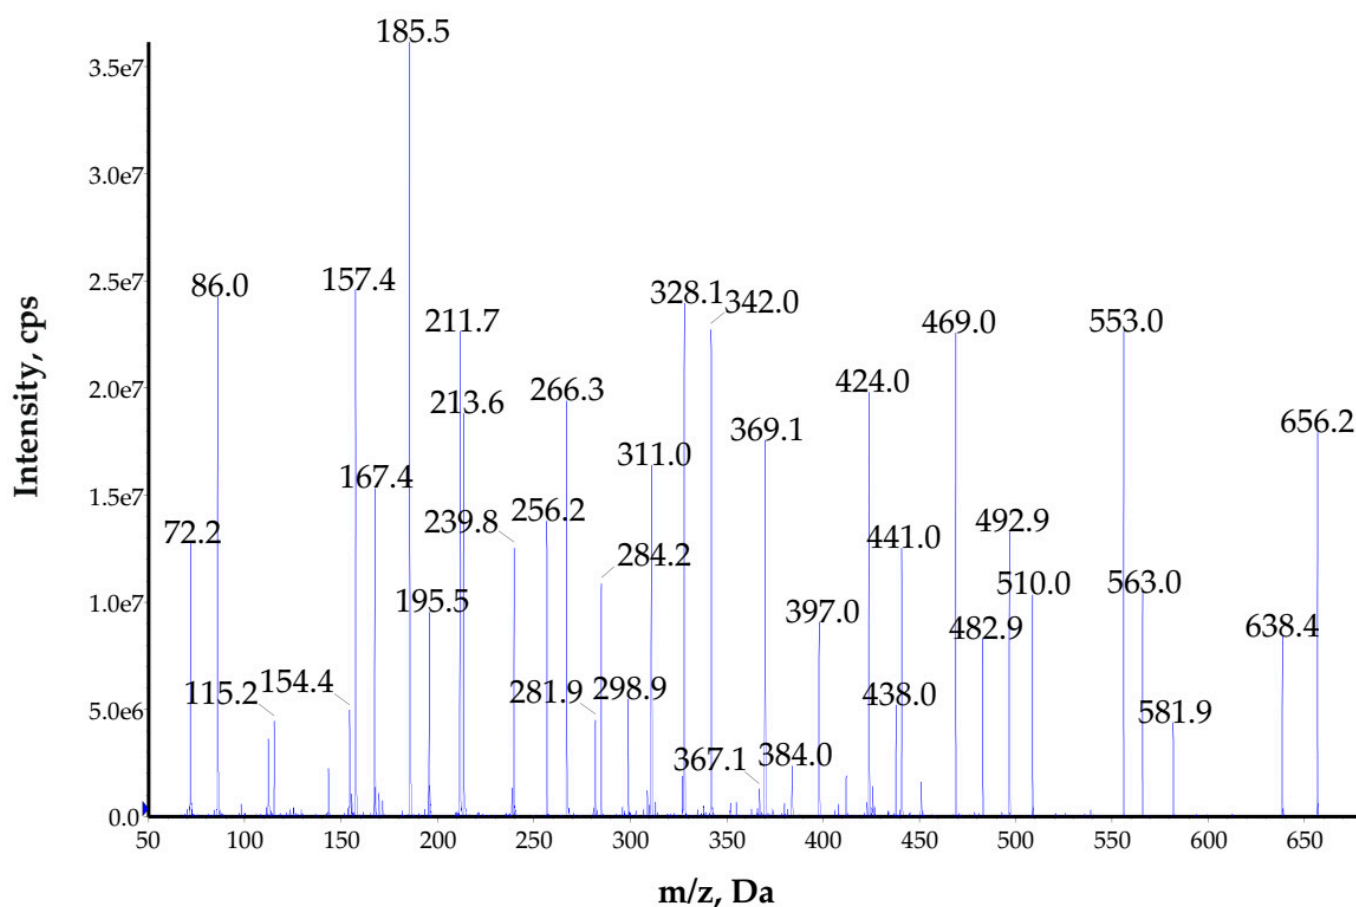

**Figure S8.** Enhanced product ion mass spectrum of the galeapeptin GP655 with the proposed structure Ala- Leu\*-Val- Leu\*-Leu\*-Ala-Gly, characterised based on the following ion peaks at  $m/z$  656  $[M + H]^+$ , 638  $[M + H - H_2O]^+$ , 581  $[M + H - Gly]^+$ , 563  $[M + H - Gly - H_2O]^+$ , 553  $[M + H - Gly - CO]^+$ , 510  $[Ala + Leu^* + Val + Leu^* + Leu^* + H]^+$ , 492  $[Ala + Leu^* + Val + Leu^* + Leu^* + H - H_2O]^+$ , 482  $[Ala + Leu^* + Val + Leu^* + Leu^* + H - CO]^+$ , 397  $[M + H - (Leu^* + Ala + Gly)]^+ / [Ala + Leu^* + Val + Leu^* + H]^+$ , 369  $[Ala + Leu^* + Val + Leu^* + H - CO]^+$ , 284  $[Ala + Leu^* + Val + H]^+$ , 266  $[Ala + Leu^* + Val + H - H_2O]^+$ , 256  $[Ala + Leu^* + Val + H - CO]^+$ , 213  $[Leu^* + Val + H]^+$ , 195  $[Leu^* + Val + H - H_2O]^+$ , 185  $[Ala + Leu^* + H]^+ / [Leu^* + Val + H - CO]^+$ , 167  $[Ala + Leu^* + H - H_2O]^+$ , 157  $[Leu^* + Ala + H - CO]^+$ , 86 Leu\* immonium ion, 72 Val immonium ion.

■ +EPI (710.41) Charge (+1) CE (50) CES (20) FT (50): Exp 2, 7.280 min from Sample 13 (CCNP1313)

Max. 1.2e7 cps.

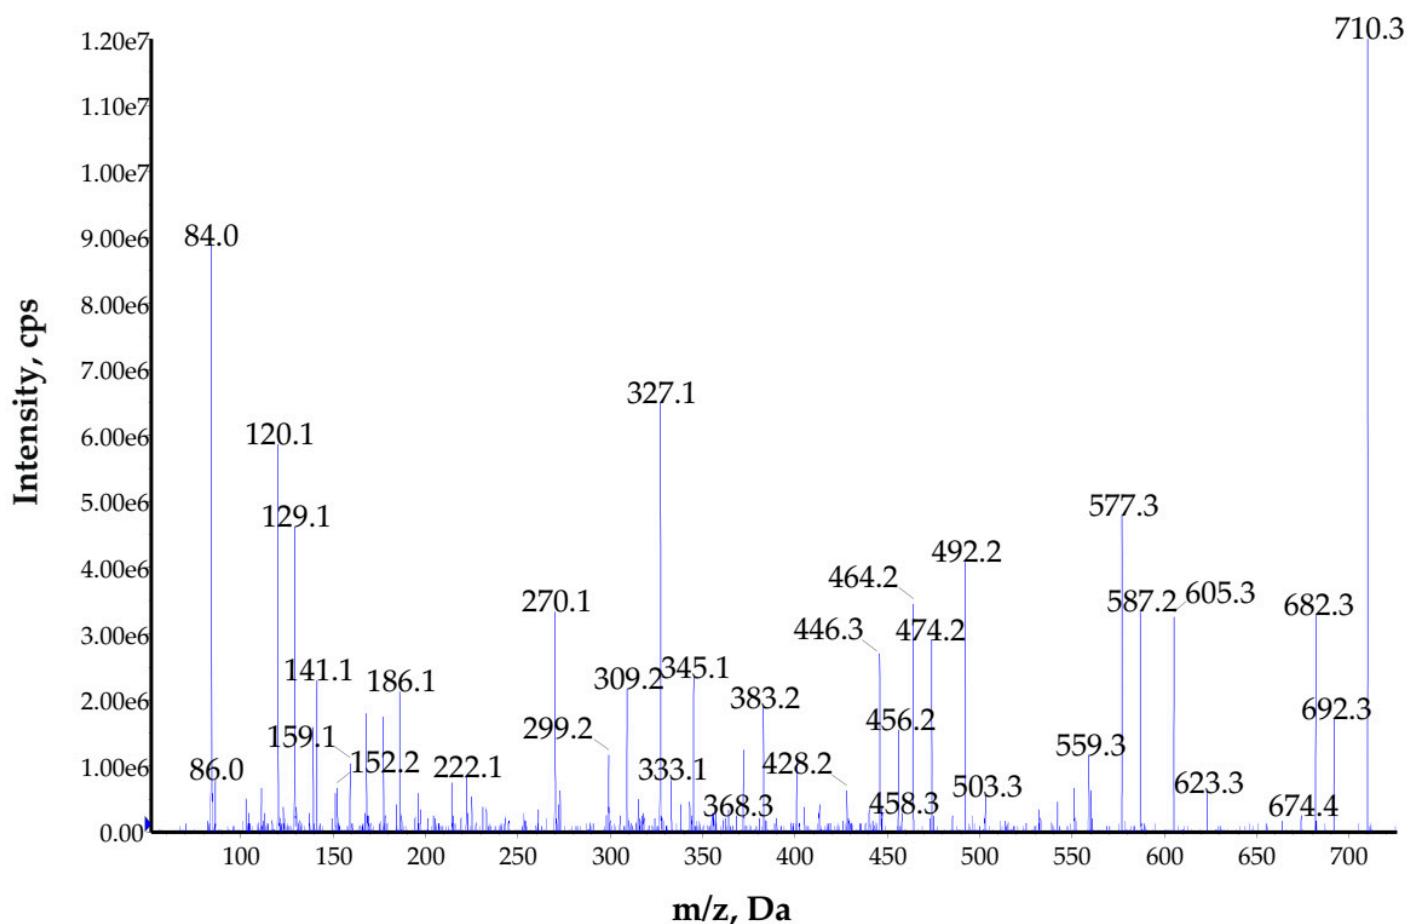

**Figure S9.** Enhanced product ion mass spectrum of peptide a peptide named PG709 with the proposed structure Arg-Met-Gly-Phe-Leu\*-Ser, characterised based on the following ion peaks at  $m/z$  710  $[M + H]^+$ , 692  $[M + H - H_2O]^+$ , 682  $[M + H - CO]^+$ , 605  $[M + H - Ser]^+$ , 587  $[M + H - Ser - H_2O]^+$ , 577  $[M + H - Ser - CO]^+$ , 559  $[M + H - Ser - CO - H_2O]^+$ , 492  $[M + H - (Leu^* + Ser)]^+$ , 474  $[M + H - (Leu^* + Ser) - H_2O]^+$ , 464  $[M + H - (Leu^* + Ser) - CO]^+$ , 446  $[M + H - (Leu^* + Ser) - H_2O - CO]^+$ , 345  $[Arg + Met + Gly + H]^+$ , 327  $[Arg + Met + Gly + H - H_2O]^+$ , 270  $[Arg + Met + H - H_2O]^+$ , 129 Arg immonium ion, 120 Phe immonium ion, 86 Leu\* immonium ion.

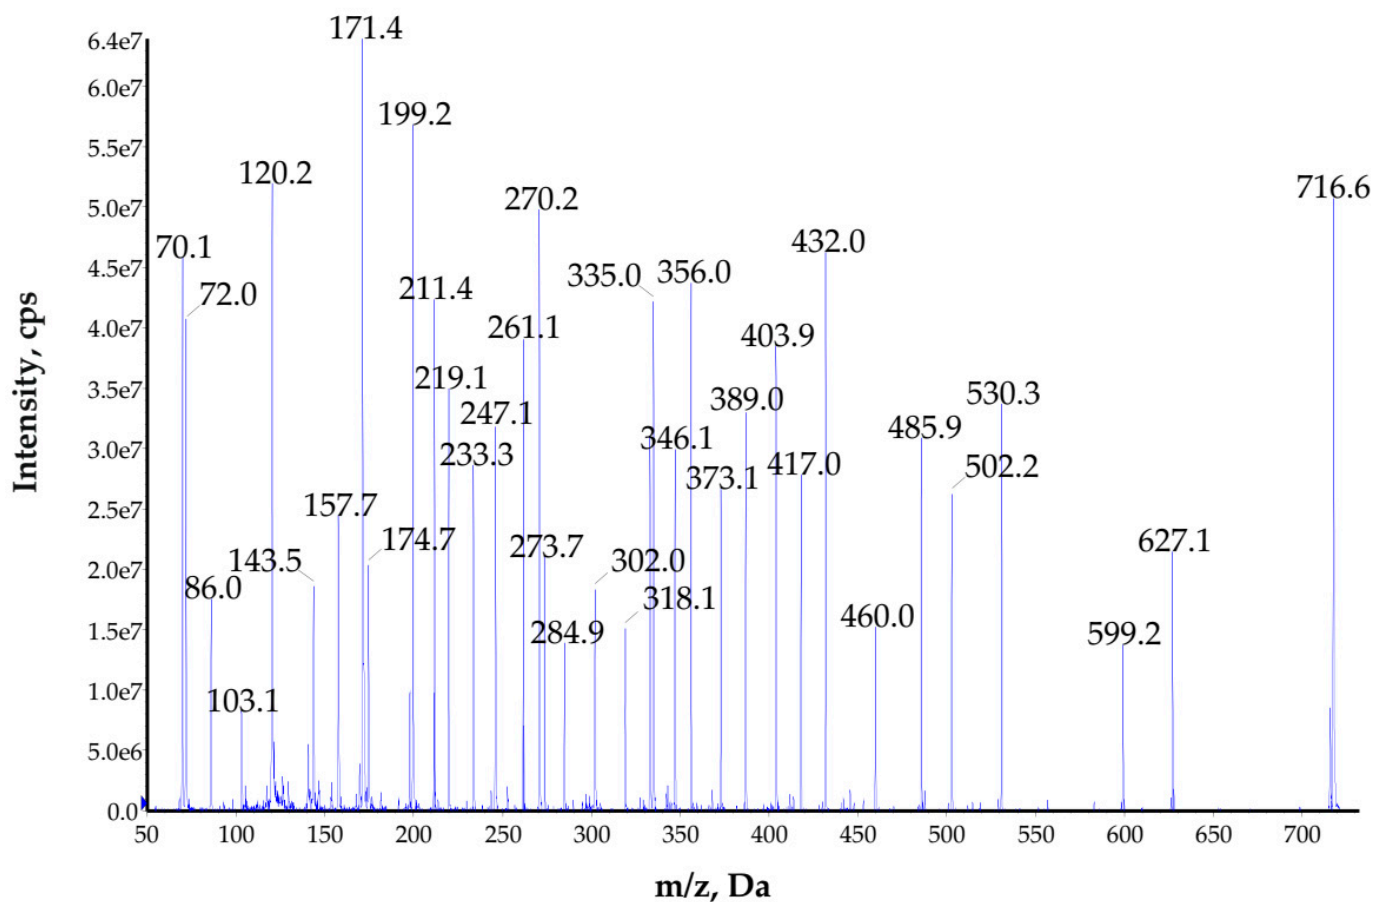

**Figure S10.** Enhanced product ion mass spectrum of galeapeptin GP715 with the proposed structure Ala-Val-Val-Phe-Leu<sup>\*</sup>-Pro-Ala, characterised based on the following ion peaks at  $m/z$  716  $[M + H]^+$ , 627  $[M + H - \text{Ala}]^+$ , 599  $[M + H - \text{Ala} - \text{CO}]^+$ , 530  $[M + H - (\text{Pro} + \text{Ala})]^+$ , 502  $[M + H - (\text{Pro} + \text{Ala}) - \text{CO}]^+$ , 460  $[\text{Val} + \text{Val} + \text{Phe} + \text{Leu}^* + H]^+$ , 432  $[\text{Val} + \text{Val} + \text{Phe} + \text{Leu}^* + H - \text{CO}]^+$ , 417  $[M + H - (\text{Leu}^* + \text{Pro} + \text{Ala})]^+$ , 389  $[M + H - (\text{Leu}^* + \text{Pro} + \text{Ala}) - \text{CO}]^+$ , 346  $[\text{Val} + \text{Val} + \text{Phe} + H]^+$ , 318  $[\text{Val} + \text{Val} + \text{Phe} + H - \text{CO}]^+$ , 270  $[\text{Ala} + \text{Val} + \text{Val} + H]^+$ , 261  $[\text{Phe} + \text{Leu}^* + H]^+$ , 247  $[\text{Val} + \text{Phe} + H]^+$ , 233  $[\text{Phe} + \text{Leu}^* + H - \text{CO}]^+$ , 219  $[\text{Val} + \text{Phe} + H - \text{CO}]^+$ , 211  $[\text{Leu}^* + \text{Pro} + H]^+$ , 199  $[\text{Val} + \text{Val} + H]^+$ , 171  $[\text{Ala} + \text{Val} + H]^+$ , 143  $[\text{Ala} + \text{Val} + H - \text{CO}]^+$ , 120 Phe immonium ion, 86 Leu<sup>\*</sup> immonium ion, 72 Val immonium ion, 70 Pro immonium ion.

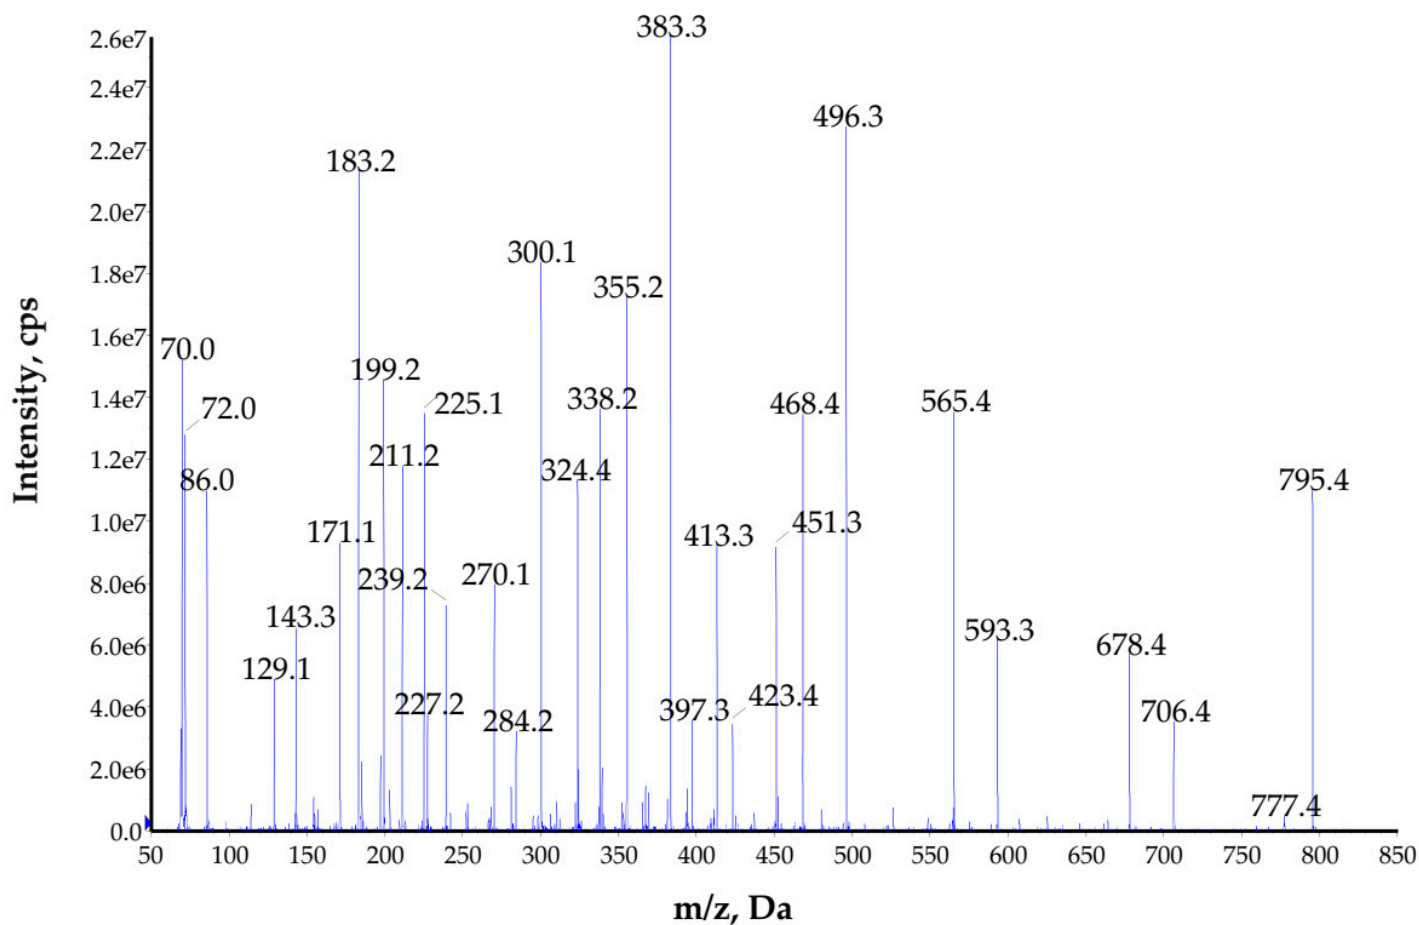

**Figure S11.** Enhanced product ion mass spectrum of galeapeptin G794 with the proposed structure Ala-Val-Val- Leu\*-Leu\*-Pro-Leu\*-Ala, characterised based on the following ion peaks at  $m/z$  795  $[M + H]^+$ , 706  $[M + H - \text{Ala}]^+$ , 678  $[M + H - \text{Ala} - \text{CO}]^+$ , 593  $[M + H - (\text{Leu}^* + \text{Ala})]^+$ , 565  $[M + H - (\text{Leu}^* + \text{Ala}) - \text{CO}]^+$ , 496  $[M + H - (\text{Pro} + \text{Leu}^* + \text{Ala})]^+$ , 468  $[M + H - (\text{Pro} + \text{Leu}^* + \text{Ala}) - \text{CO}]^+$ , 383  $[\text{Ala} + \text{Val} + \text{Val} + \text{Leu}^* + \text{H}]^+$ , 355  $[\text{Ala} + \text{Val} + \text{Val} + \text{Leu}^* + \text{H} - \text{CO}]^+$ , 324  $[\text{Leu}^* + \text{Leu}^* + \text{Pro} + \text{H}]^+$ , 270  $[\text{Ala} + \text{Val} + \text{Val} + \text{H}]^+$ , 211  $[\text{Leu}^* + \text{Pro} + \text{H}]^+$ , 199  $[\text{Leu}^* + \text{Leu}^* + \text{H} - \text{CO}]^+$ , 183  $[\text{Leu}^* + \text{Pro} + \text{H} - \text{CO}]^+$ , 171  $[\text{Ala} + \text{Val} + \text{H}]^+$ , 143  $[\text{Ala} + \text{Val} + \text{H} - \text{CO}]^+$ , 86 Leu\* immonium ion, 72 Val immonium ion, 70 Pro immonium ion.

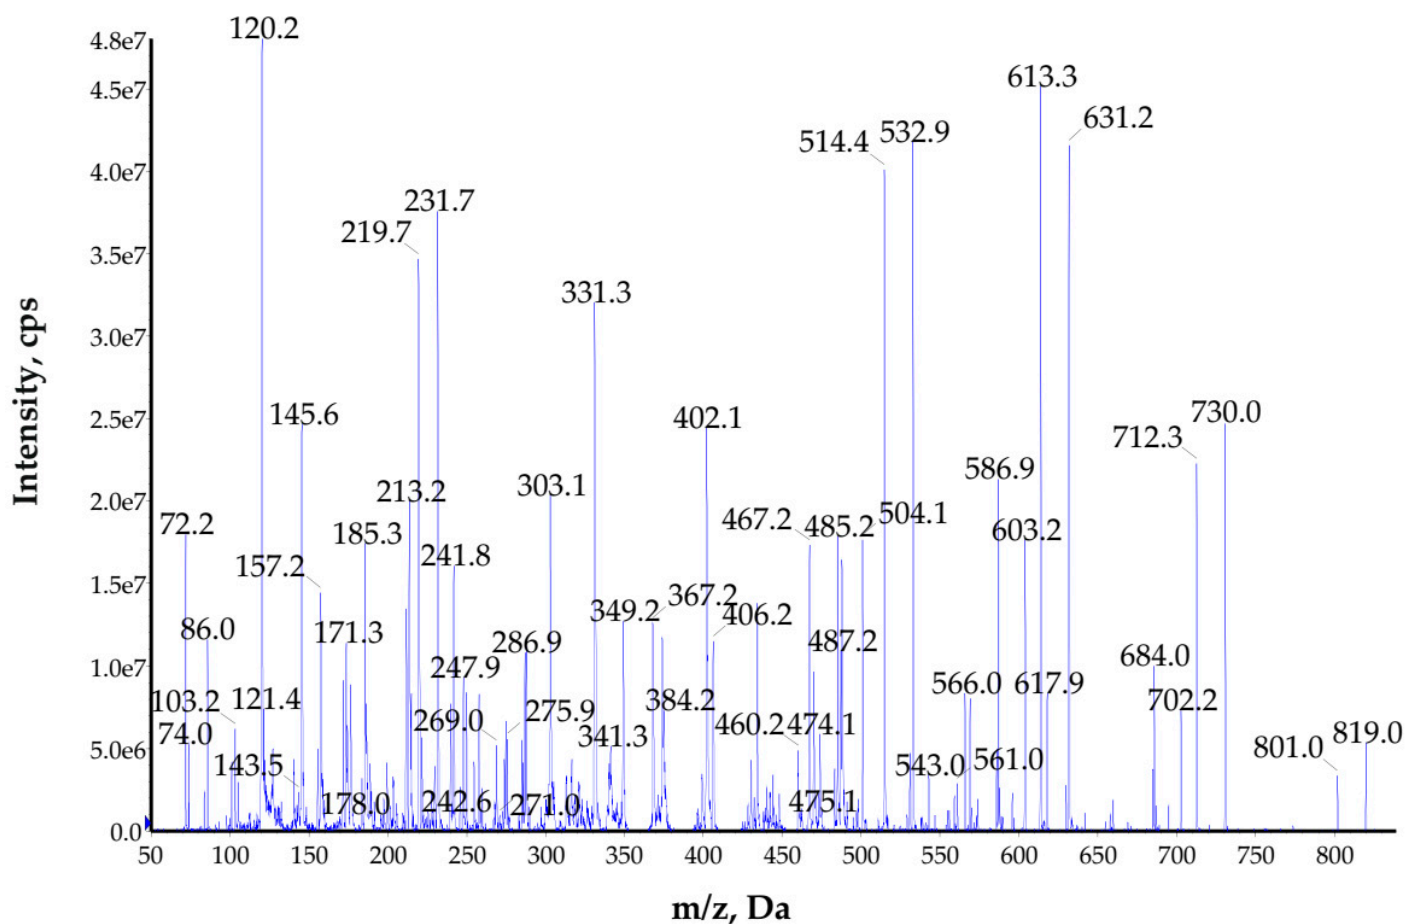

**Figure S12.** Enhanced product ion mass spectrum of galeapeptin GP818 with the proposed structure Ala-Thr-Leu\*-Val-Phe-Val-Val-Ala, characterised based on the following ion peaks at  $m/z$  819  $[M + H]^+$ , 801  $[M + H - H_2O]^+$ , 730  $[M + H - Ala]^+$ , 712  $[M + H - Ala - H_2O]^+$ , 702  $[M + H - Ala - CO]^+$ , 684  $[M + H - Ala - H_2O - CO]^+$ , 631  $[M + H - (Val + Ala)]^+$ , 613  $[M + H - (Val + Ala) - H_2O]^+$ , 603  $[M + H - (Val + Ala) - CO]^+$ , 532  $[M + H - (Val + Val + Ala)]^+$ , 514  $[M + H - (Val + Val + Ala) - H_2O]^+$ , 504  $[M + H - (Val + Ala) - CO]^+$ , 367  $[M + H - (Phe - Val + Val + Ala) - H_2O]^+$ , 213  $[Leu^* + Val + H]^+$ , 185  $[Ala + Leu^* + H]^+$ , 157  $[Ala + Leu^* + H - CO]^+$ , 171  $[Val + Val + H - CO]^+$ , 120 Phe immonium ion, 86 Leu\* immonium ion, 74 Thr immonium ion, 72 Val immonium ion.

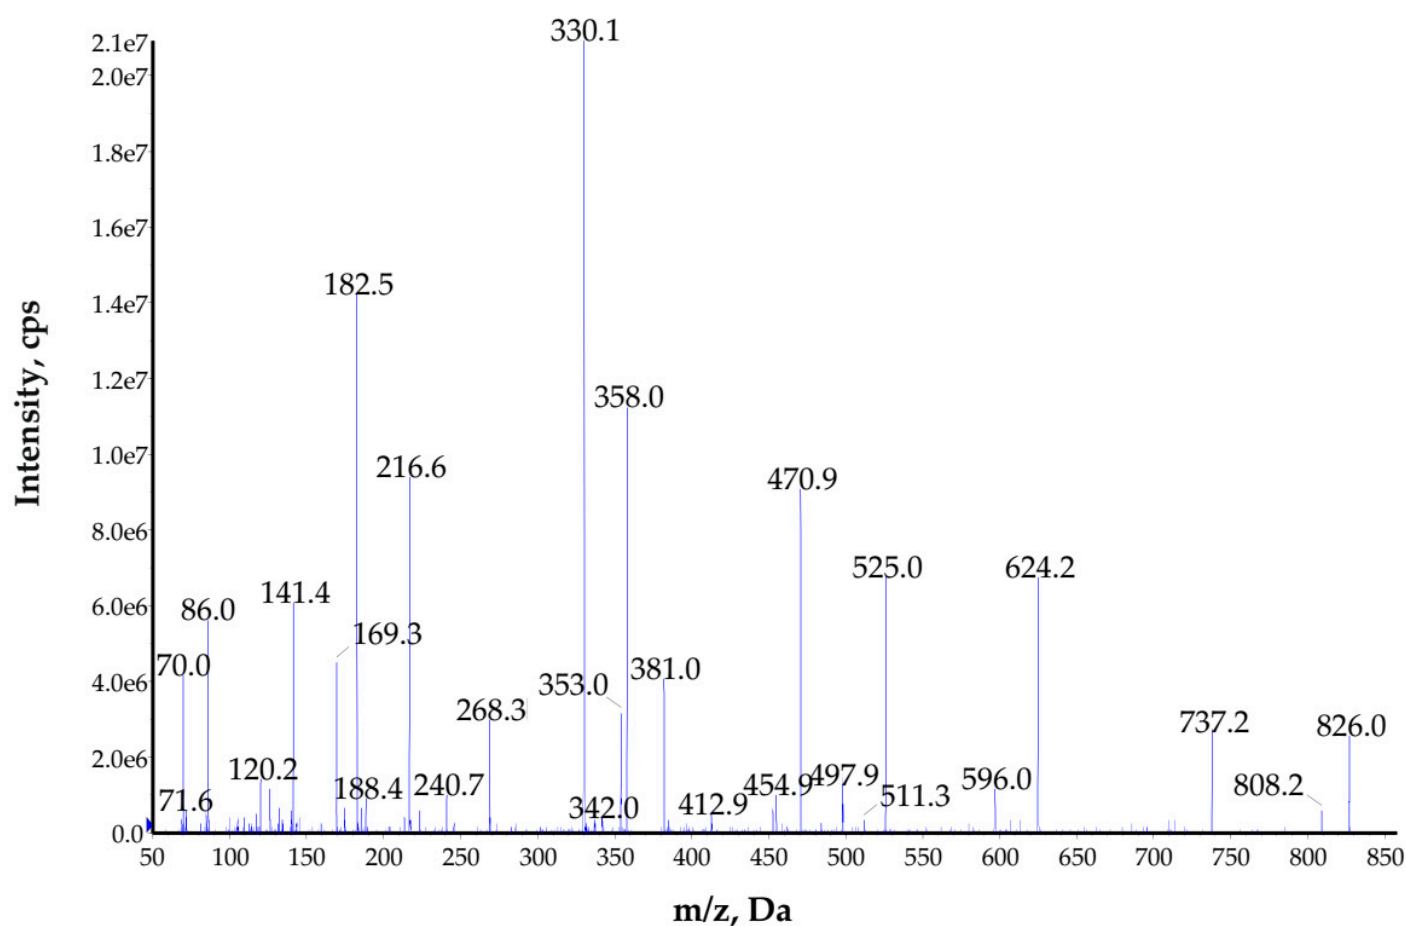

**Figure S13.** Enhanced product ion mass spectrum of galeapeptin GP825 with the proposed partially elucidated structure Ala-Pro-Val-Leu<sup>\*</sup>-?-Val-Leu<sup>\*</sup>-Ala, characterised based on the following ion peaks at  $m/z$  826  $[M + H]^+$ , 808  $[M + H - H_2O]^+$ , 737  $[M + H - Ala]^+$ , 624  $[M + H - (Leu^* + Ala)]^+$ , 596  $[M + H - (Leu^* + Ala) - CO]^+$ , 525  $[M + H - (Val + Leu^* + Ala)]^+$ , 497  $[M + H - (Val + Leu^* + Ala) - CO]^+$ , 381  $[Ala + Pro + Val + Leu^* + H]^+$ , 353  $[Ala + Pro + Val + Leu^* + H - CO]^+$ , 268  $[Ala + Pro + Val + H]^+$ , 169  $[Ala + Pro + H]^+$ , 141  $[Ala + Pro + H - CO]^+$ , 120 Phe immonium ion, 86 Leu<sup>\*</sup> immonium ion.

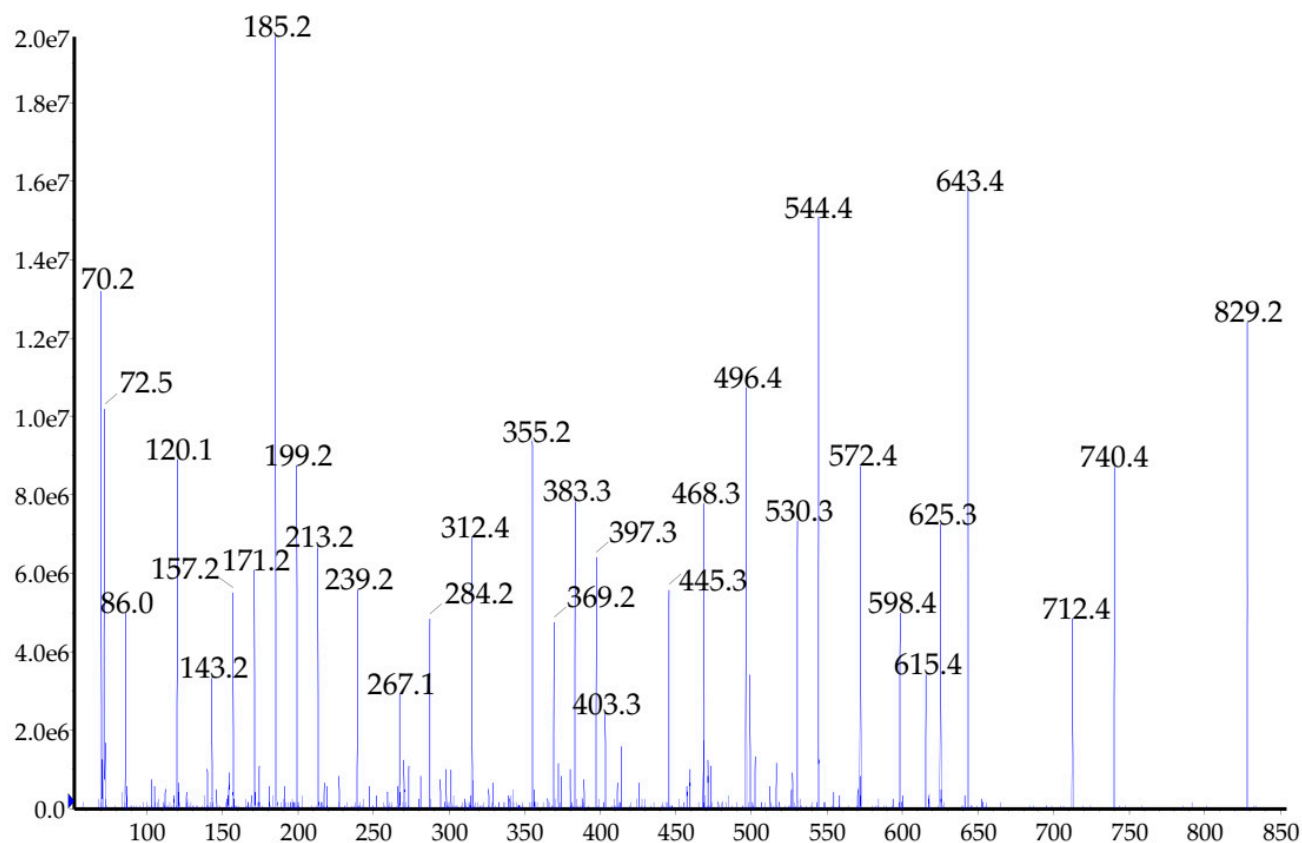

**Figure S14.** Enhanced product ion mass spectrum of galeapeptin GP828 with the proposed structure Ala-Leu\*-Val-Val-Leu\*-Phe-Pro-Ala, characterised based on the following ion peaks at  $m/z$  829  $[M + H]^+$ , 740  $[M + H - Ala]^+$ , 712  $[M + H - Ala - CO]^+$ , 643  $[M + H - (Pro + Ala)]^+$ , 625  $[M + H - (Pro + Ala) - H_2O]^+$ , 615  $[M + H - (Pro + Ala) - CO]^+$ , 572  $[M + H - Ala - (Pro + Ala)]^+$ , 544  $[M + H - Ala - (Pro + Ala) - CO]^+$ , 496  $[M + H - (Pro + Ala)]^+$ , 468  $[M + H - (Pro + Ala) - CO]^+$ , 383  $[Ala + Leu^* + Val + Val + H]^+$ , 355  $[Ala + Leu^* + Val + Val + H - CO]^+$ , 312  $[Leu^* + Val + Val + H]^+$ , 284  $[Ala + Leu^* + Val + H]^+$ , 213  $[Leu^* + Val + H]^+$ , 185  $[Leu^* + Val + H - CO]^+$  /  $[Ala + Leu^* + H]^+$ , 199  $[Val + Val + H]^+$ , 157  $[Ala + Leu^* + H - CO]^+$ , 171  $[Val + Val + H - CO]^+$ , 120 Phe immonium ion, 86 Leu\* immonium ion, 72 Val immonium ion, 70 Pro immonium ion.

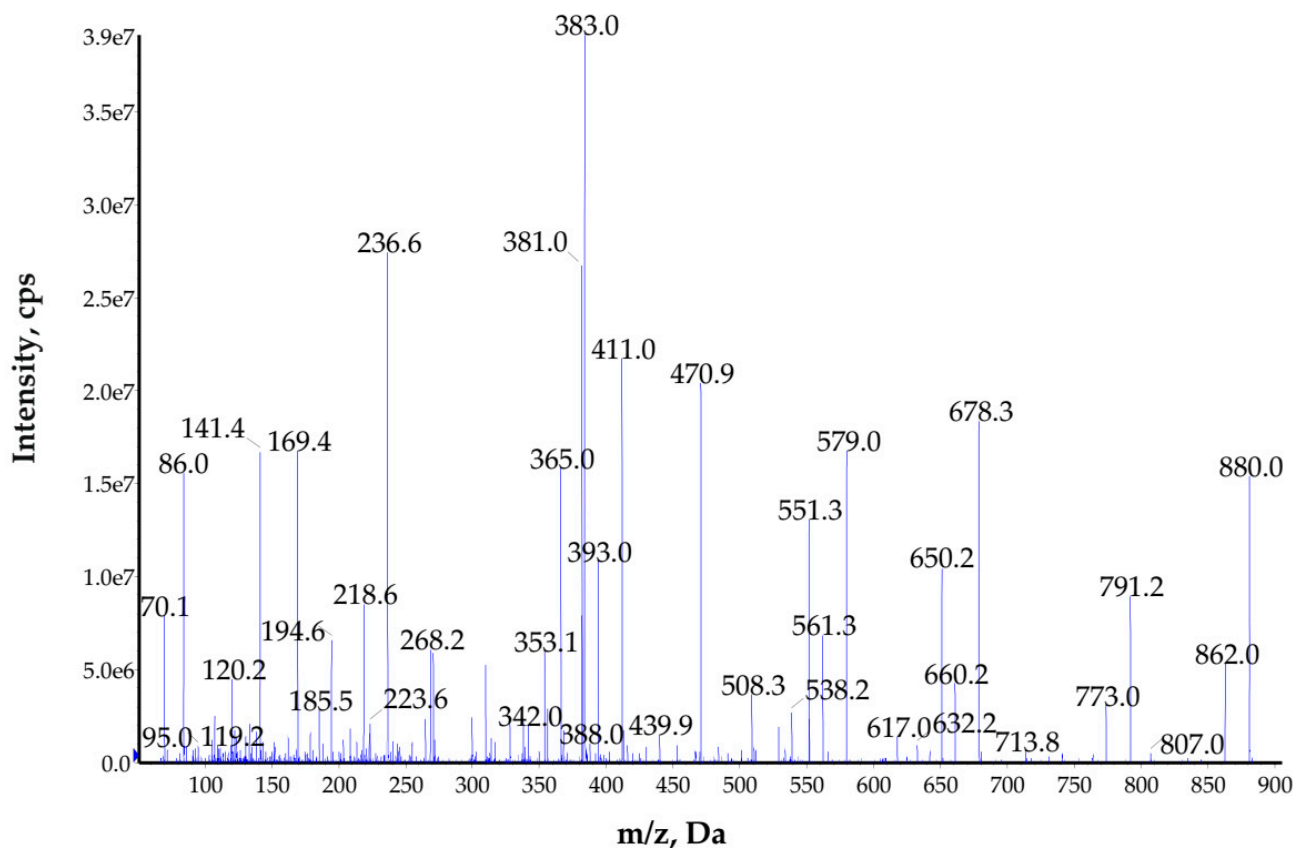

**Figure S15.** Enhanced product ion mass spectrum of galeapeptin GP879 with the proposed partially elucidated structure Ala-Pro-Val-?-Pro-Ala-Val-Leu\*-Ala, characterised based on the following ion peaks at  $m/z$  880  $[M + H]^+$ , 862  $[M + H - H_2O]^+$ , 791  $[M + H - Ala]^+$ , 773  $[M + H - Ala - H_2O]^+$ , 678  $[M + H - (Leu^* + Ala)]^+$ , 660  $[M + H - (Leu^* + Ala) - H_2O]^+$ , 650  $[M + H - (Leu^* + Ala) - CO]^+$ , 632  $[M + H - (Leu^* + Ala) - H_2O - CO]^+$ , 579  $[M + H - (Val + Leu^* + Ala)]^+$ , 561  $[M + H - (Val + Leu^* + Ala) - H_2O]^+$ , 551  $[M + H - (Val + Leu^* + Ala) - H_2O - CO]^+$ , 508  $[M + H - (Ala + Val + Leu^* + Ala)]^+$ , 411  $[M + H - (Pro + Ala + Val + Leu^* + Ala)]^+$ , 393  $[M + H - (Pro + Ala + Val + Leu^* + Ala) - H_2O]^+$ , 383  $[M + H - (Pro + Ala + Val + Leu^* + Ala) - CO]^+$ , 381  $[Ala + Pro + Val + Leu^* + H]^+$ , 365  $[M + H - (Pro + Ala + Val + Leu^* + Ala) - H_2O - CO]^+$ , 353  $[Ala + Pro + Val + Leu^* + H - CO]^+$ , 268  $[Ala + Pro + Val + H]^+$ , 169  $[Ala + Pro + H]^+$ , 141  $[Ala + Pro + H - CO]^+$ , 120 Phe immonium ion, 86 Leu\* immonium ion.



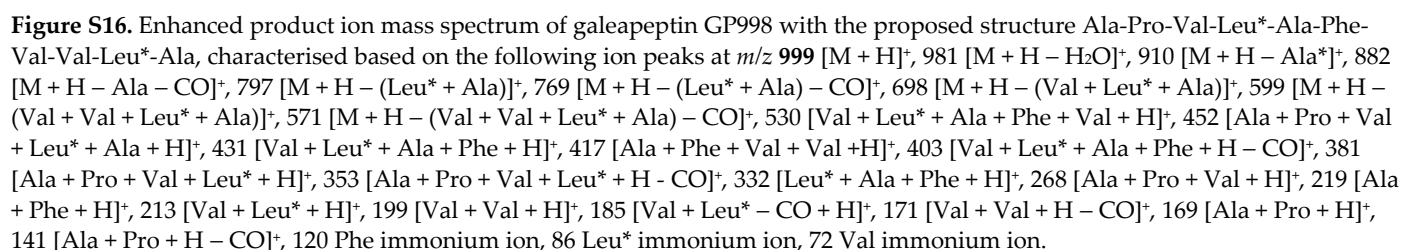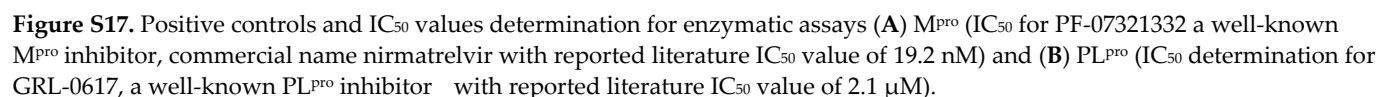

Supplement: s1 [file s1]
